# Supplementary material for: Glucose conjugated aza-BODIPY for enhanced photodynamic cancer therapy
Source: Royal Society of Chemistry journal article supplement (doi:10.1039/d1ob00400j), 2021-01-01
Supplement: d1ob00400j1.pdf [file d1ob00400j1.pdf]

## Supporting Information

### Glucose Conjugated Aza-BODIPY for Selective Photodynamic Cancer Therapy

Jongjit Treekoon<sup>a</sup>, Thitima Pewklang<sup>a</sup>, Kantapat Chansaenpak<sup>b</sup>, Jaggaiah Naidu Gorantla<sup>a,c</sup>,  
Salila Pengthaisong<sup>a,c</sup>, Rung-Yi Lai<sup>a,c</sup>, James R. Ketudat-Cairns<sup>a,c</sup>, Anyanee Kamkaew<sup>a\*</sup>

<sup>a</sup> School of Chemistry, Institute of Science, Suranaree University of Technology, Nakhon Ratchasima 30000, Thailand

<sup>b</sup> National Nanotechnology Center, National Science and Technology Development Agency, Thailand Science Park, Pathum Thani, Thailand 12120

<sup>c</sup> Center for Biomolecular Structure, Function and Application, Suranaree University of Technology, Nakhon Ratchasima 30000, Thailand

|                                                                                           | Page |
|-------------------------------------------------------------------------------------------|------|
| <sup>1</sup> H and <sup>13</sup> C Nuclear Magnetic resonance (NMR) spectra.....          | 2    |
| Mass spectrometry results.....                                                            | 5    |
| Singlet oxygen generation of <b>AZB-Glc-I</b> .....                                       | 7    |
| Time-dependent internalization of <b>AZB-P</b> in cancer cells.....                       | 7    |
| Competition assay between D-/L-Glucose and <b>AZB-P</b> .....                             | 8    |
| Stability of <b>AZB-Glc-I</b> , <b>AZB-Glc</b> , and <b>AZB-P-I</b> stock solutions ..... | 8    |

# 1. $^1\text{H}$ and $^{13}\text{C}$ Nuclear Magnetic resonance (NMR) spectra

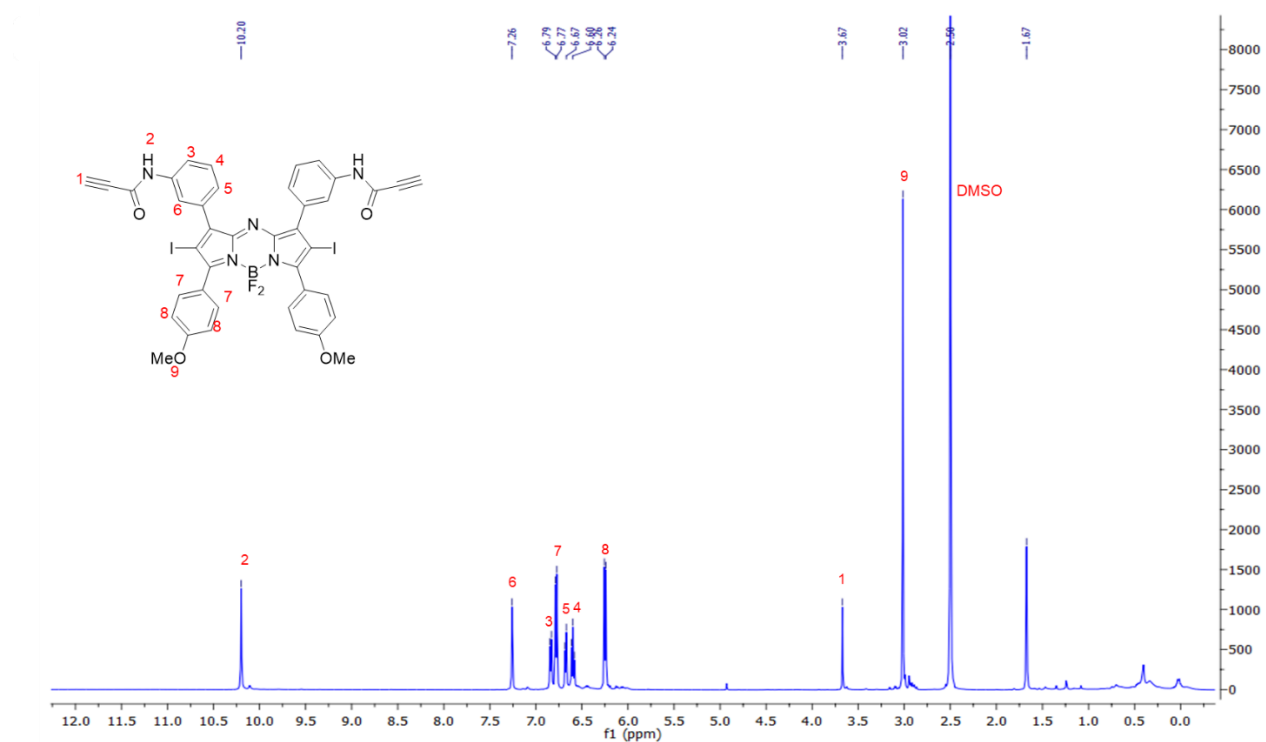

$^1\text{H}$  NMR spectrum of AZB-PI.

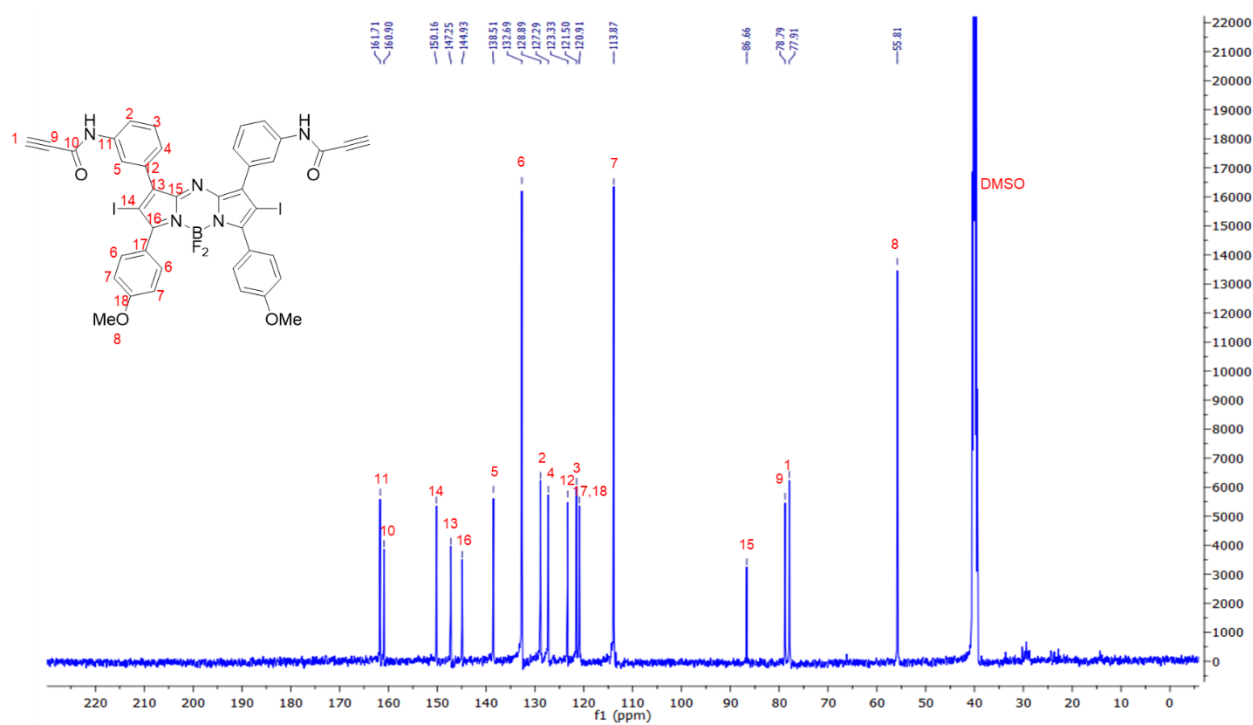

$^{13}\text{C}$  NMR spectrum of AZB-PI.

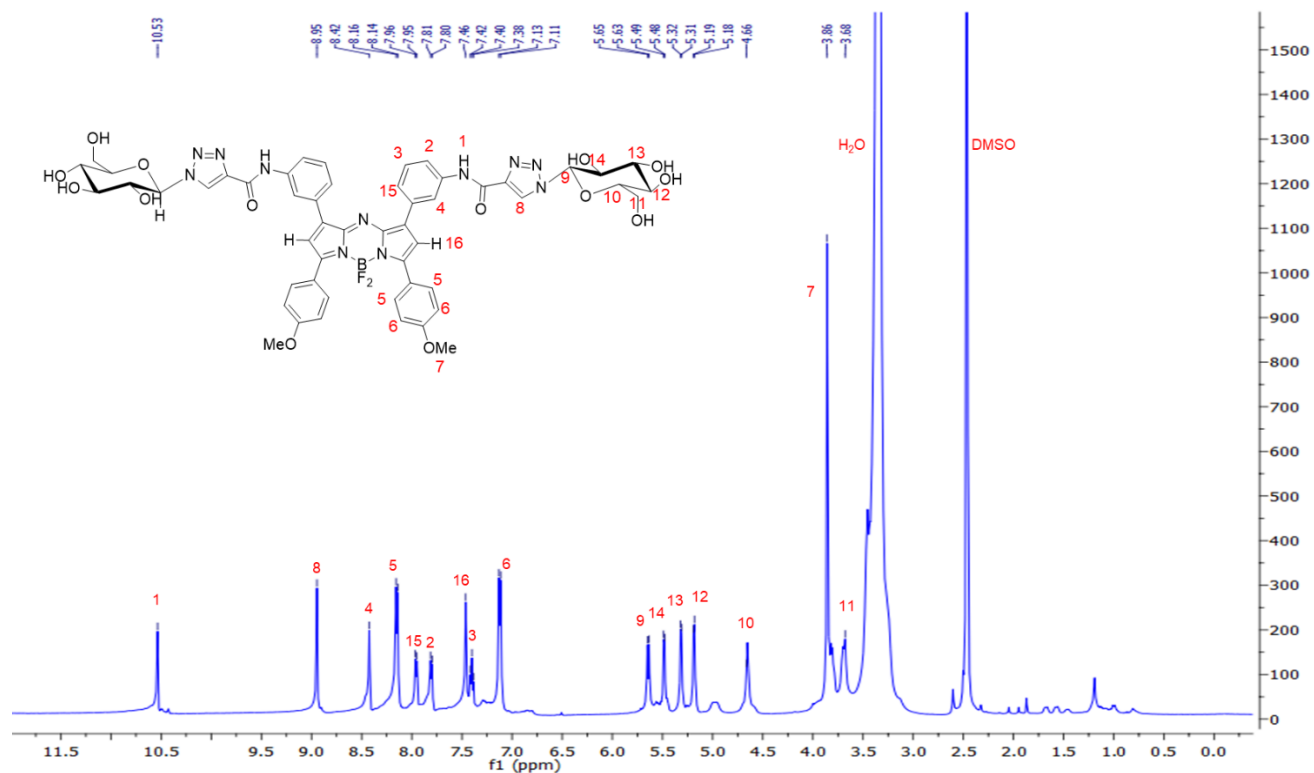

<sup>1</sup>H NMR spectrum of AZB-Glc.

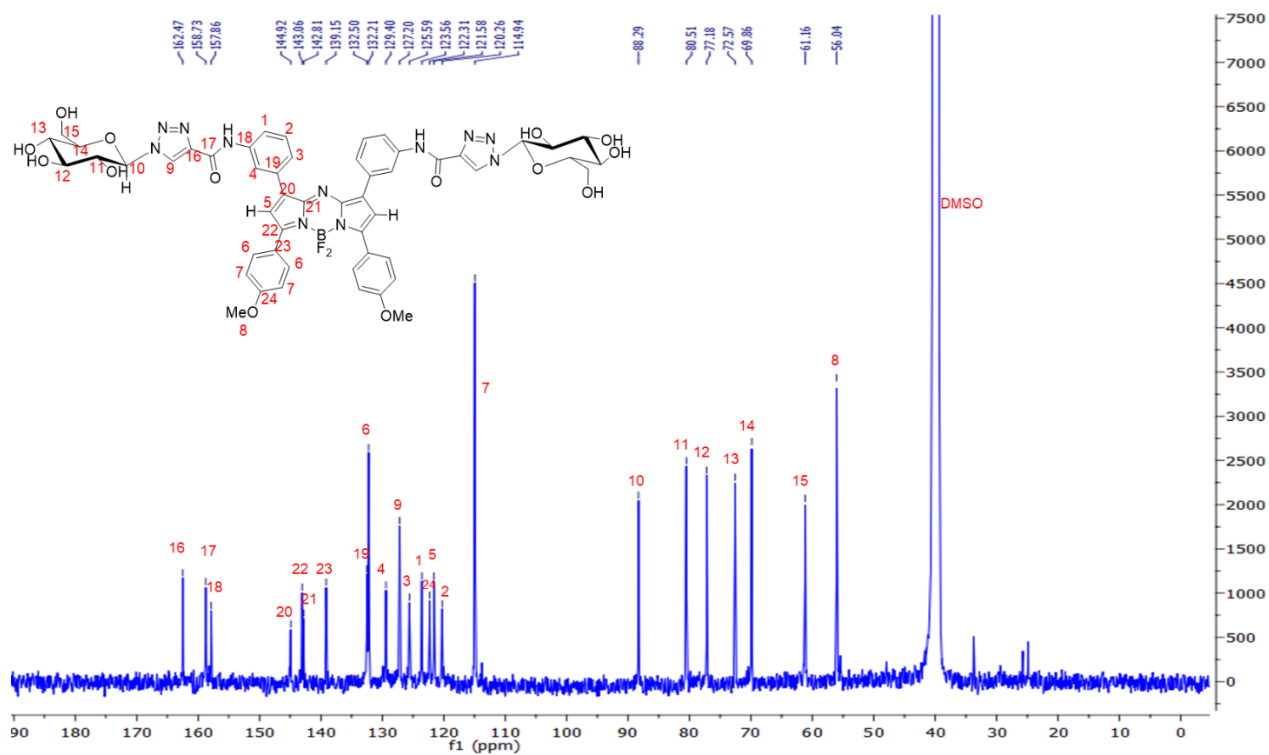

<sup>13</sup>C NMR spectrum of AZB-Glc.

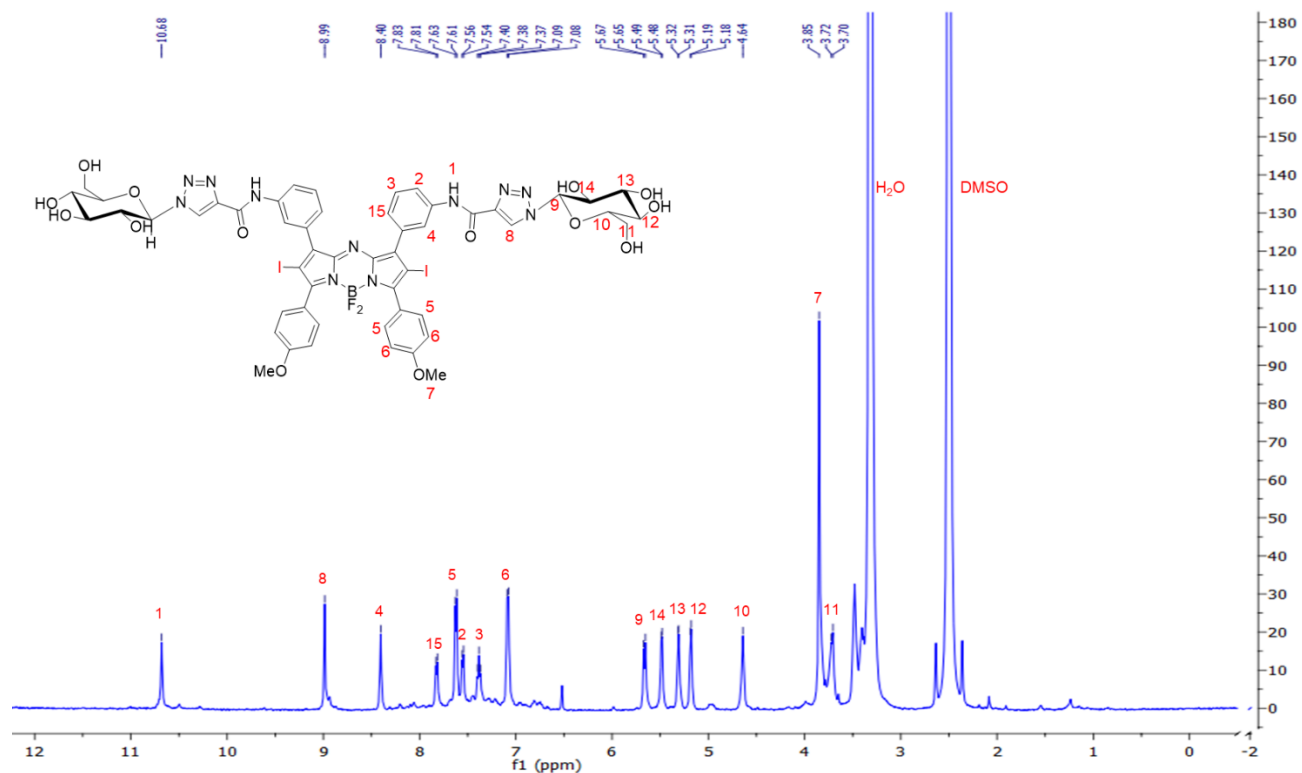

<sup>1</sup>H NMR spectrum of AZB-Glc-I.

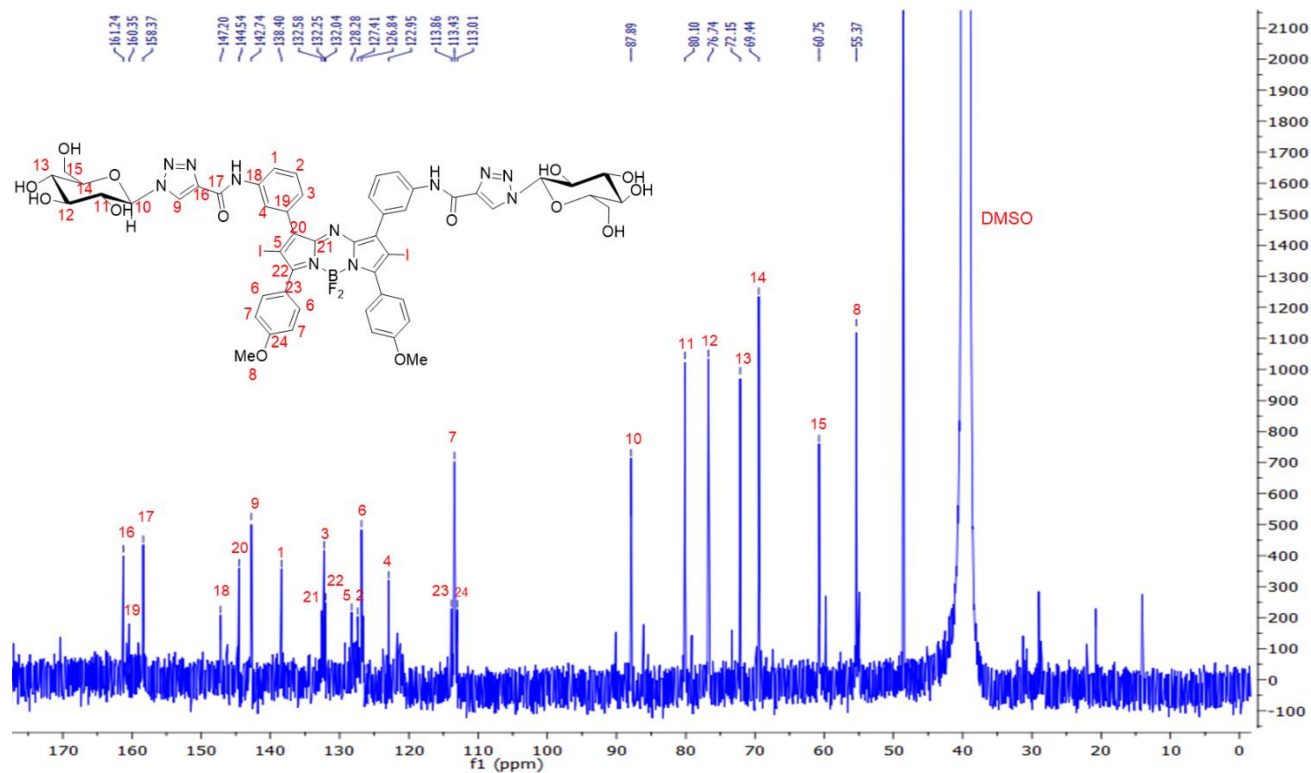

<sup>13</sup>C NMR spectrum of AZB-Glc-I.

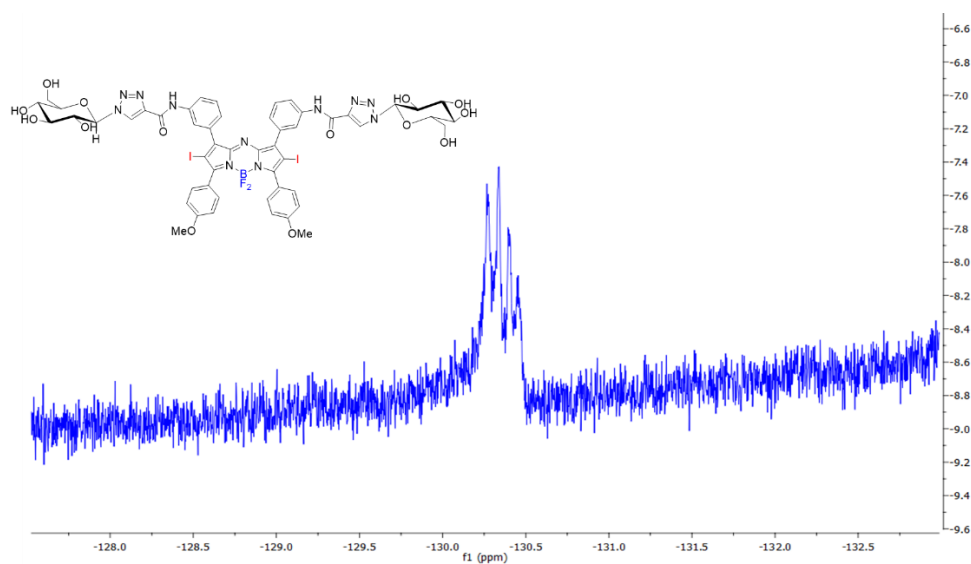

$^{19}\text{F}$  NMR spectrum of AZB-Glc-I.

## 2. Mass spectrometry results

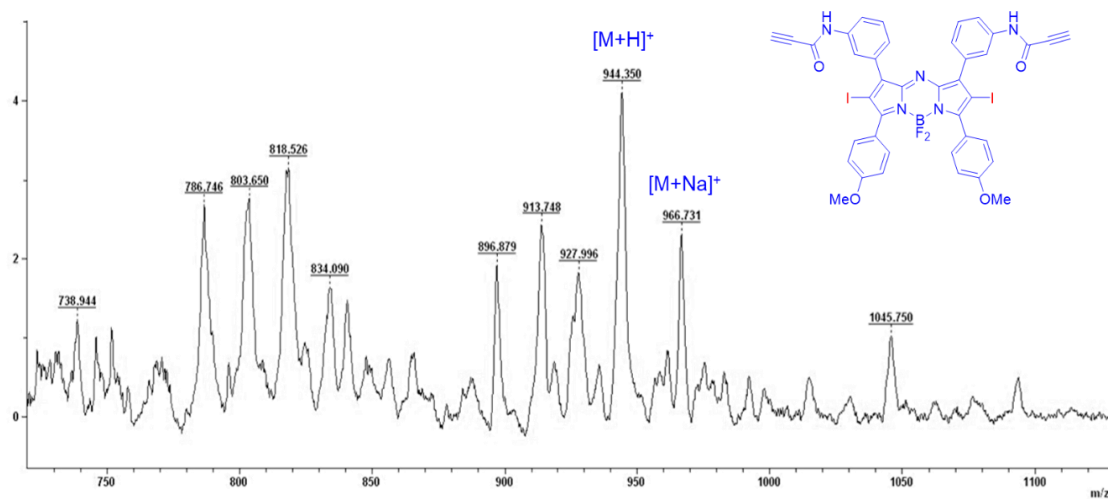

Mass spectrum of AZB-PI.

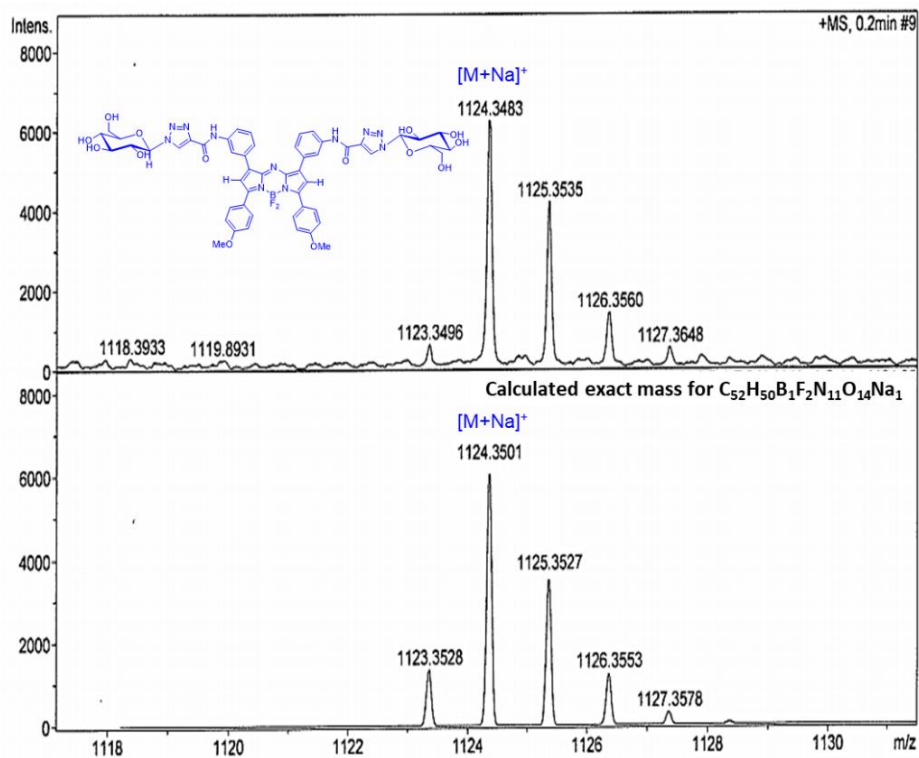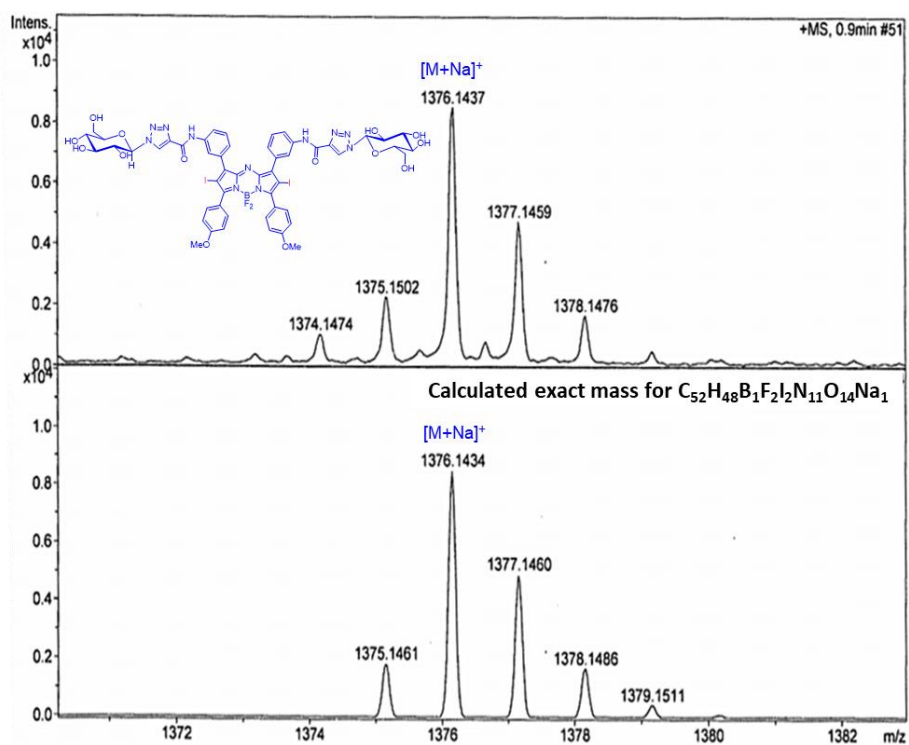

### 3. Singlet oxygen generation of AZB-Glc-I

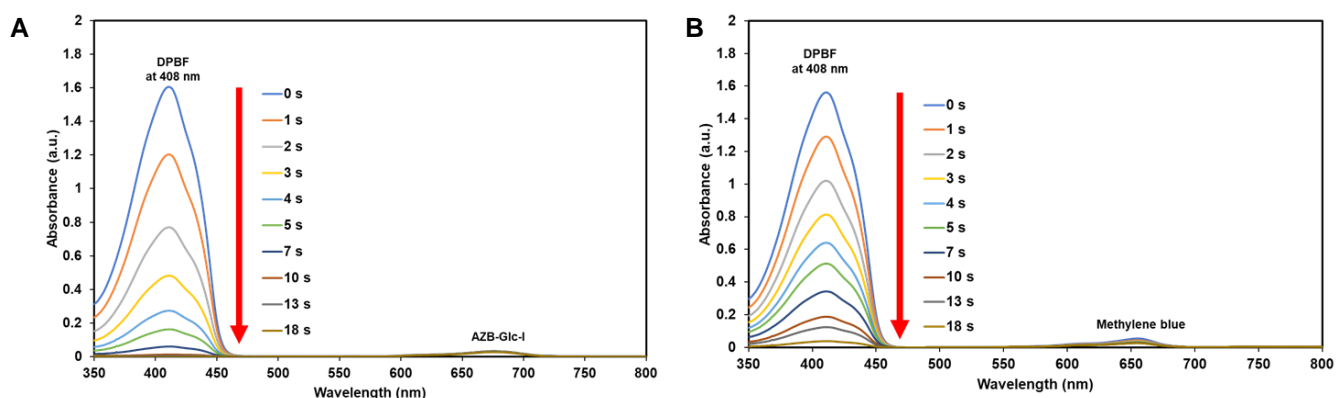

**Figure S1.** DPBF absorbance changes at 408 nm under being exposed to NIR light in the presence of A) **AZB-Glc-I** B) Methylene blue in ethanol.

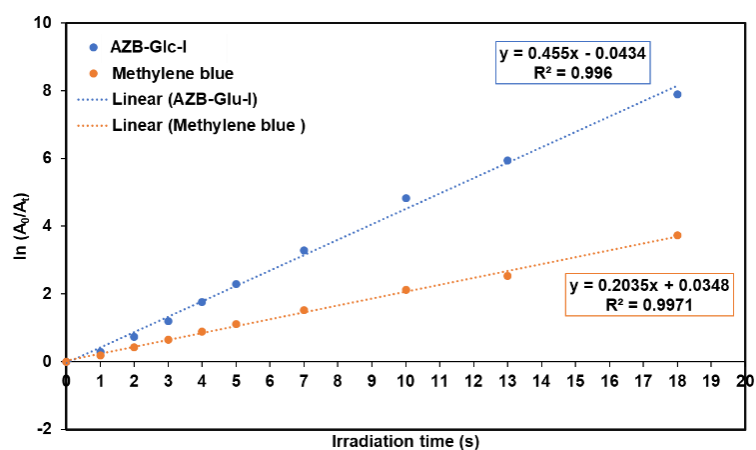

**Figure S2.** The first order kinetic plot of DPBF absorbance at 408 nm vs irradiation times.

### 4. Time dependent internalization of AZB-P in cancer cells

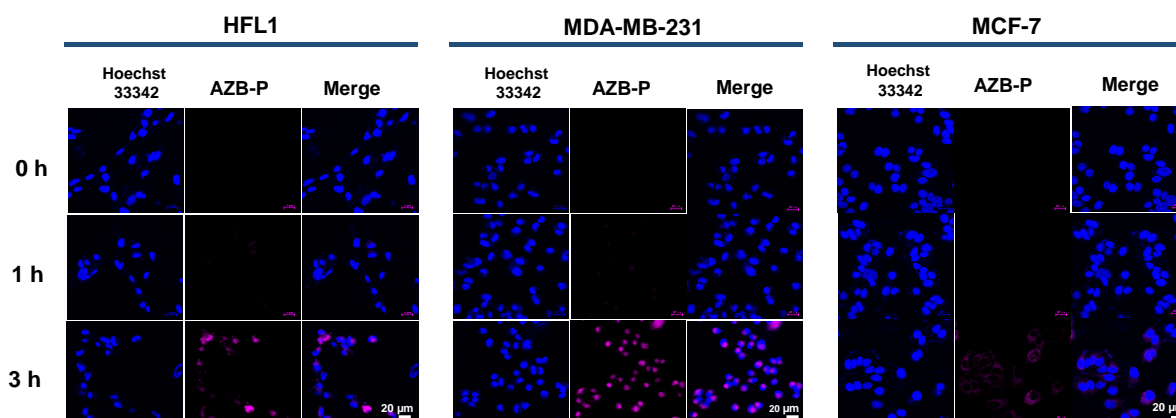

**Figure S3.** Time dependent internalization of **AZB-P** (5 μM) in HFL1, MDA-MB-231 and MCF-7 cells in various incubation times. Scale bars = 20 μm.

## 5. Competition assay between *D*-/*L*-Glucose and AZB-P

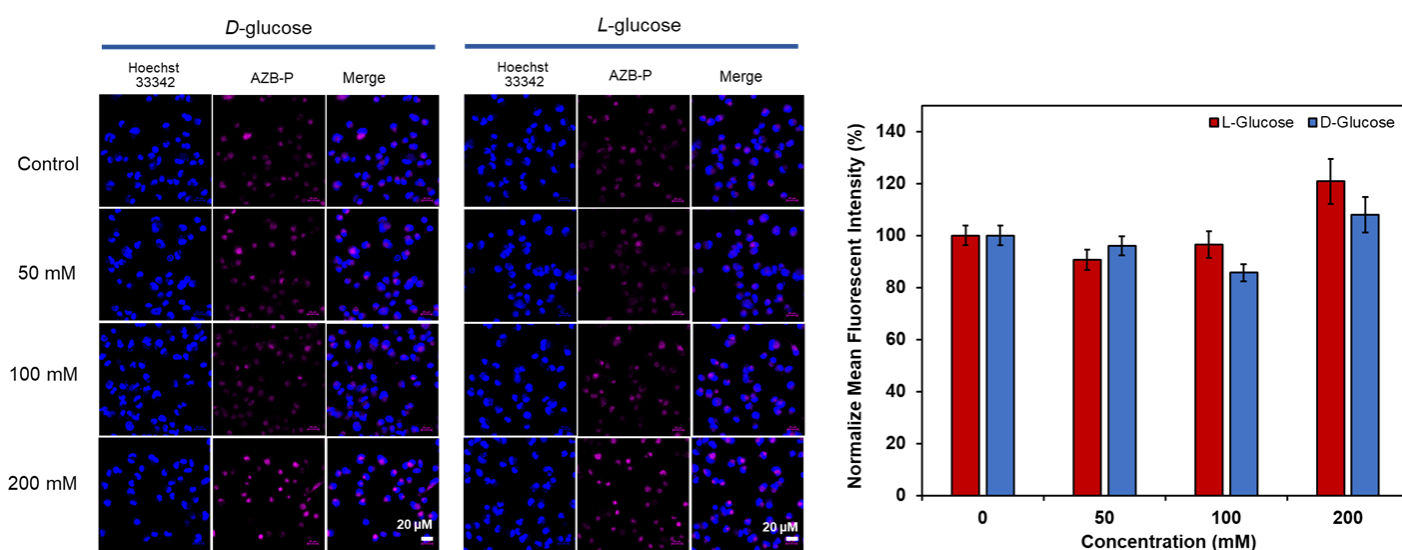

**Figure S4.** Glucose competition assay of **AZB-P** (5 μM) in MDA-MB-231 cells in the presence of various concentrations of *D*- Glucose and *L*-Glucose for 30 min. The fluorescence intensities of the images were quantified using Image J and data are presented as means ± SD (n = 40) in the bar graph. Scale bars = 20 μm.

## 6. Stability of AZB-Glc-I, AZB-Glc, and AZB-P-I stock solutions

Solutions of **AZB-Glc-I**, **AZB-Glc**, and **AZB-P-I** were made as 1.5 mM stocks in DMSO and stored at 20 °C. Before measuring absorbance spectra, all compounds were diluted in DMEM (to mimic the cell assay condition) to a final concentration of 5 μM. The NIR absorption of **AZB-Glc-I**, **AZB-Glc**, and **AZB-P-I** were measured by UV-VIS spectrometer (Thermo Scientific/MultiskanGO) in three independent experiments, every day for 7 days. The absorbance at 705 nm was normalized relative to the freshly prepared stock solutions.

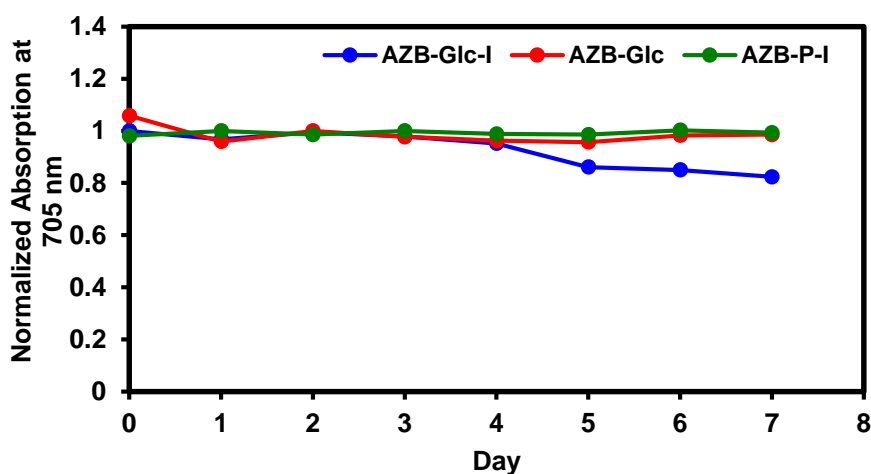

**Figure S5.** Normalized absorption at 705 nm of **AZB-Glc-I**, **AZB-Glc**, and **AZB-P-I** stock solutions in DMSO measured every day for 7 days.
